# Supplementary material for: Icotinib With Concurrent Radiotherapy vs Radiotherapy Alone in Older Adults With Unresectable Esophageal Squamous Cell Carcinoma: A Phase II Randomized Clinical Trial
Source: PubMed Central journal article supplement (PMC7542309; doi:10.1001/jamanetworkopen.2020.19440), 2020-10-07
Supplement: jamanetwopen-e2019440-s001.pdf [file jamanetwopen-e2019440-s001.pdf]

1 **CLINICAL PROTOCOL**

2  
3 Icotinib with Concurrent Radiotherapy versus Radiotherapy alone in Elderly Patients  
4 with Esophageal Squamous Cell Carcinoma: A Randomized Multicenter Open-label  
5 Phase II Trial

6  
7  
8 Test product: Icotinib

9 Study Sponsor: Hangzhou Cancer Hospital Major Subject Foundation and Zhejiang  
10 Bata Pharma Inc. China

11 Principal Investigator: Prof Shixiu Wu, M.D.

12 Hangzhou Cancer Hospital

13 34 Yanguan Lane, Hangzhou

14 Recruitment Site: Hangzhou Cancer Hospital, Hangzhou, China; Huaian First  
15 People's Hospital, Huaian, China; Lishui Central Hospital, Lishui, China.

16  
17  
18  
19  
20  
21  
22  
23  
24  
25  
26  
27  
28  
29  
30  
31  
32  
33  
34  
35  
36  
37  
38  
39  
40  
41  
42 **Activation Date: December 12, 2014**

43 **Update Date: December 22, 2014**

44 **Version Date: January 12, 2015**

|    |    |                                                                 |
|----|----|-----------------------------------------------------------------|
| 45 |    | <b>TABLE OF CONTENTS</b>                                        |
| 46 | 1  | <b>BACKGROUND AND RATIONALE</b>                                 |
| 47 |    | 1.1 Unmet Medical Needs                                         |
| 48 |    | 1.2 A Novel Therapeutic Strategy for Elderly Patients with ESCC |
| 49 |    | 1.3 Study Rationable                                            |
| 50 | 2  | <b>STUDY OBJECTIVES</b>                                         |
| 51 |    | 2.1 Primary Endpoints of the Study                              |
| 52 |    | 2.2 Secondary Endpoints of the Study                            |
| 53 |    | 2.3 Exploratory Endpoints of the study                          |
| 54 | 3  | <b>STUDY DESIGN</b>                                             |
| 55 |    | 3.1 Study Population                                            |
| 56 |    | 3.2 Screening of Participants                                   |
| 57 | 4  | <b>STUDY PROCEDURES</b>                                         |
| 58 |    | 4.1 Subject Enrolment                                           |
| 59 |    | 4.2 Treatment Procedures                                        |
| 60 | 5  | <b>DESCRIPTION OF STUDY</b>                                     |
| 61 |    | 5.1 Common Toxicity Criteria                                    |
| 62 |    | 5.2 Concomitant Treatments                                      |
| 63 |    | 5.3 Treatment Interruptions                                     |
| 64 |    | 5.4 Dose Modifications                                          |
| 65 |    | 5.5 EGFR Expression Assessment                                  |
| 66 |    | 5.6 Schedule Visits and Follow-Up                               |
| 67 |    | 5.7 Withdrawal of Study Subjects                                |
| 68 |    | 5.8 Lost to Follow-Up                                           |
| 69 |    | 5.9 Assessments                                                 |
| 70 | 6  | <b>SAFETY DATA COLLECTION, RECORDING, AND REPORTING</b>         |
| 71 |    | 6.1 Adverse Events                                              |
| 72 |    | 6.2 Serious Adverse Events                                      |
| 73 | 7  | <b>END OF STUDY</b>                                             |
| 74 |    | 7.1 Primary Completion                                          |
| 75 |    | 7.2 End of Trial                                                |
| 76 | 8  | <b>STATISTICAL CONSIDERATIONS</b>                               |
| 77 |    | 8.1 Study Endpoints, Subsets, and Covariates (Phase II)         |
| 78 | 9  | <b>ETHICAL CONSIDERATIONS</b>                                   |
| 79 |    | 9.1 Good Clinical Practice                                      |
| 80 |    | 9.2 Independent Ethics Committee                                |
| 81 |    | 9.3 Informed Consent                                            |
| 82 |    | 9.4 Subject Confidentiality                                     |
| 83 | 10 | <b>REFERENCES</b>                                               |
| 84 |    |                                                                 |
| 85 |    |                                                                 |
| 86 |    |                                                                 |
| 87 |    |                                                                 |
| 88 |    |                                                                 |

89 **1. BACKGROUND AND RATIONALE**

90 **1.1 Unmet Medical Needs**

91 Esophageal cancer is the sixth most common cause of cancer deaths worldwide<sup>1</sup>. Esophageal cancer  
92 increases in incidence with age. It is estimated that over 20% of patients with esophageal cancer are  
93 diagnosed at an elderly age<sup>2</sup>. The number of elderly patients with esophageal cancer is expected to  
94 increase in the future.

95 Surgery plays the pivotal role for the treatment of early-stage and localized esophageal carcinoma<sup>3</sup>. For  
96 patients with localized esophageal carcinoma selected for nonsurgical treatment, the standard therapy is  
97 concurrent chemoradiation therapy<sup>4,5</sup>. However, due to the limitations of medical conditions, the  
98 elderly patients with esophageal carcinoma are generally not considered candidates for surgery and are  
99 unable to tolerate the toxicity of concurrent chemoradiation<sup>3,6,7</sup>. Palliative radiotherapy alone should  
100 generally be recommended for elderly patients, but with a limit survival benefit<sup>4</sup>. There is an urgent  
101 need to develop novel agents with a favorable toxicity profiles for elderly patients with localized  
102 esophageal carcinoma.

103 **1.2 A Novel Therapeutic Strategy for Elderly Patients with esophageal carcinoma**

104 Epidermal growth factor receptor (EGFR) is overexpressed in 30–70% of esophageal carcinoma cases  
105 and is associated with poor prognosis and an inferior response to conventional treatment<sup>8,9</sup>. EGFR  
106 tyrosine kinase inhibitors (TKIs) achieved response rates of 2% to 13% in advanced squamous cell  
107 carcinoma and adenocarcinoma of the esophagus in phase II trials<sup>10,11</sup>. EGFR TKI helps disrupt cell  
108 growth pathways and makes cells more sensitive to the effects of radiotherapy<sup>12,13</sup>. EGFR TKI  
109 combined with chemoradiotherapy (CRT) has been evaluated in esophageal carcinoma<sup>14</sup>. EGFR TKIs  
110 plus thoracic radiation have confirmed the safety profile and have shown some clinically beneficial in  
111 esophageal cancer patients<sup>15-17</sup>. Elderly patients with esophageal cancer may benefit from EGFR TKIs  
112 plus thoracic radiation. In an attempt to improve the clinical results, a pilot study of erlotinib plus  
113 radiotherapy in elderly esophageal cancer patients showed encouraging survival results and reasonable  
114 safety profile<sup>16</sup>.

115 **1.3 Study Rationable**

116 A recent Chinese study showed that for elderly patients received oral gefitinib with RT, the overall  
117 response rate was 90%. Median OS and progression free survival were 14.0 and 7.0 months,  
118 respectively<sup>18</sup>. Iyer et al. evaluated the combination of erlotinib plus RT for patients aged over 65 years  
119 in USA<sup>15</sup>. Survival results revealed that the median OS and progression free survival were 7.3 and 4.5  
120 months, respectively.

121 Icotinib, another oral EGFR-TKI, was associated with more favorable toxicity profile than gefitinib or  
122 erlotinib<sup>8</sup>. It was reported that icotinib markedly inhibited the proliferation of the human epidermoid  
123 squamous carcinoma A431 cell line with a high level of EGFR<sup>8</sup>. The toxicities associated with icotinib  
124 and RT do not overlap, which enables their concomitant administration. There were no direct  
125 comparisons between radiotherapy alone and radiotherapy plus icotinib for esophageal cancer.  
126 However, a prospective phase I study showed that the combination of icotinib and IMRT in patients  
127 with locally nasopharyngeal cancer had an acceptable safety profile and was well tolerated<sup>19</sup>.

128 **2. STUDY OBJECTIVES**

129 **2.1. Primary Endpoints of the Study**

- 130 • To evaluate whether overall survival in the combined group was superior to the RT alone group.

131 **2.2. Secondary Endpoints of the Study**

- 132 • To evaluate disease free survival and treatment toxicity.

133 **2.3. Exploratory Objective**

- 134 • To evaluate the predictive biomarkers in subjects receiving icotinib treatment.

135 **3. STUDY DESIGN**

136 This is a randomized, multicenter, open-label phase II trial to evaluate the efficacy and toxicity of  
137 radiotherapy plus epidermal growth factor receptor (EGFR) tyrosine-kinase inhibitor (icotinib) in  
138 elderly esophageal squamous cell carcinoma (ESCC) patients. The study will consist of 3 periods:  
139 screening period (up to 4 weeks); treatment period (6 weeks); follow-up period (3-month interval in the  
140 first 2 years, at 6-month interval for 3 years, then annually). The trial protocol was approved by the  
141 institutional review board and independent ethics committee of each participating center  
142 (ClinicalTrials.gov, study identifier: NCT02375581). Patients will complete the scheduled treatment  
143 until disease progression or until discontinuation of study therapy (discontinuation due to toxicity,  
144 withdrawal of consent).

145 **3.1. Study Population**

146 Signed informed consent was obtained before any study procedure. Patients must be able to understand  
147 and be willing to sign a written informed consent.

148 Inclusion/exclusion criteria must be met at the time of study screening.

149 3.1.1 The Criteria for inclusion in our study included:

- 150 1) Pathologically confirmed esophageal squamous cell cancer;  
151 2) Clinical stages II–IVA disease according to the International Union Against Cancer (UICC, 2002)  
152 TNM stage criteria, without contraindication for radical radiotherapy;  
153 3) Aged  $\geq 70$ ;  
154 4) Eastern Cooperative Oncology Group (ECOG) performance status 0-2;  
155 5) adequate bone marrow, renal, hepatic, cardiac, and respiratory function ( In 7 days after being  
156 screened, subjects should follow the status: WBC  $\geq 3.0 \times 10^9/L$ ; ANC  $\geq 1.5 \times 10^9/L$ ; PLT  $\geq$   
157  $80 \times 10^9/L$ ; Hb  $\geq 90$  g/L; serum Cr  $\leq$  ULN; serum bilirubin  $\leq 1.5$  ULN; ALT/AST  $\leq 1.5$   
158 ULN) ;  
159 6) Subjects should sign for the informed consent;  
160 7) Subjects should perform good compliance;  
161 8) No obstacle in oral medicine .

162 3.1.2 The exclusion criteria were as follows:

- 163 1) Patients who have or are currently undergoing additional chemotherapy, radiation therapy or targeted  
164 therapy;  
165 2) Complete obstruction of the esophagus, or patients who have the potential to develop perforation;  
166 3) Patients with a history of malignancy (except that skin carcinomas or in situ breast cancer, oral  
167 cancer and cervical cancer with expected survival  $\geq 2$  years);  
168 4) Patients who have multiple foci esophageal carcinomas;  
169 5) Patients who are/were given any other medicine tests currently/in last 4 weeks;  
170 6) Experienced hypersensitiveness with similar medicine or other kinds of bio-medicines;  
171 7) Patients who have complications as following:  
172 a) Uncontrolled angina and heart failure, have a history of hospitalization in 3 months;  
173 b) A history of myocardial infarction in the past 6 months;  
174 c) There is a need for antibiotic treatment of acute bacterial or fungal infection;  
175 d) Chronic obstructive pulmonary disease, or other lung disease requiring hospitalization;  
176 e) Drug addiction, alcoholism and AIDS disease or long-term virus carriers;

177 f) Uncontrollable seizures, or loss of insight because of mental illness.

### 178 **3.2 Screening of Participants**

179 Medical history will be collected during screening and must date back to the original diagnosis of  
180 ESCC. If a subject is referred to the study center, a copy of all applicable reports and histological  
181 evidence confirming the diagnosis must be provided to the study center before enrolment. Once a  
182 patient has personally signed the consent form, study specific screening procedures may commence.

183 All patients must have the following procedures within 2 weeks before their therapy (imaging  
184 examination within 4 weeks):

- 185 • Review and documentation of inclusion and exclusion criteria.
- 186 • Medical and medication history
- 187 • Height and weight
- 188 • ECOG performance status
- 189 • Physical examination
- 190 • 12-lead electrocardiogram (ECG) taken after the patient has been supine for at least 5 minutes
- 191 • Laboratory tests: blood chemistry, full blood count, coagulation parameters, stool test, urinalysis,  
192 calculated creatinine clearance
- 193 • Imaging by neck/chest CT, abdominal/ pelvic CT/MRI to assess disease extent
- 194 • FDG-PET/CT scan, brain CT/MRI and cardiac ultrasound as clinical indicated
- 195 • Immunohistochemistry to analyze EGFR expression in patients were optional, but encouraged.

## 196 **4. STUDY PROCEDURES**

### 197 **4.1. Subject Enrolment**

198 Before patients are enrolled into the study, a copy of an approval letter clearly identifying the version  
199 of the protocol and patient informed consent form are required. All patients must personally sign and  
200 date the consent form before any study-specific screening procedures are performed. Standard medical  
201 practice procedures performed prior to the signing of the consent form, which are performed  
202 irrespective of the patient's potential involvement in the study, may be used for screening purposes if  
203 they comply with the study requirements. The expectation is that once the informed consent form is  
204 signed, study specific screening procedures will commence as soon as is practicable.

205 Patients who do not meet the eligibility criteria may be rescreened at the discretion of the investigator if  
206 their status changes. However, once enrolled, the patient may not be enrolled more than once in the  
207 study.

### 208 **4.2. Treatment Schedule**

209 Eligible patients were randomly assigned, in a 1:1 ratio, to two groups: RT+icotinib group and RT  
210 alone group. Central randomization was done with the use of the random number table method.  
211 Patients were stratified according to clinical stage.

#### 212 **4.2.1 Radiotherapy**

213 Radiotherapy consisted of 60 Gy given in 30 fractions in all patients using high-energy linear  
214 accelerators with conventional fraction, three-dimensional conformal technique or intensity-modulated  
215 radiotherapy ( 3D-CRT/IMRT).

216 For both newly diagnosed patients in two groups, the gross tumor volume (GTV) was defined as the  
217 volume of the primary tumor shown on the esophageal barium exam, upper digestive endoscopy and  
218 CT; and metastatic lymph nodes were defined as lymph nodes of  $\geq 1$  cm in the shortest axis and  $\geq 5$   
219 mm local in the trachea oesophagus groove. The clinical target volume (CTV) was defined by adding  
220 5-cm margins of proximal and distal uninvolved oesophagus, including 1-cm lateral margins. The

221 planning target volume (PTV) was calculated by adding 1-cm margins around the CTV, but the margins  
222 were reduced when the PTV recovered the spinal cord. The gross tumor volume (GTV) received 60 Gy  
223 (30 fractions at 2 Gy per fraction) and clinical target volume (CTV) was 40 Gy (20 fractions at 2 Gy  
224 per fraction).

225 Plan optimisation was as follows: (1) 99% of the PTV was covered by 95% of the prescribed dose; (2)  
226 95% of the PTV volume was covered by the prescribed dose; and (3) the maximum dose did not exceed  
227 110% of the prescribed dose in a continuous volume of <1 cm<sup>3</sup> in the PTV.

228 The normal tissue constraints of the critical organs were as follows: the maximum spinal cord point  
229 dose of  $\leq 45$  Gy; the lung V20 (percentage of total lung volume receiving  $\geq 20$  Gy)  $\leq 30\%$ , and the  
230 mean lung dose  $\leq 16$  Gy; the mean heart dose  $\leq 30$  Gy; and the maximum intestine dose  $\leq 50$   
231 Gy.

#### 232 4.2.2 Icotinib Treatment

233 Icotinib was orally administered at a dose of 125mg/time, three times a day, during the course of  
234 radiotherapy in RT+icotinib group without interruption until it was stopped due to excessive toxicity,  
235 disease progression, or patient request.

### 236 5. DESCRIPTION OF STUDY

237 This phase II study foresees a total of 6 weeks of treatment. In the study, all patients will receive  
238 radiotherapy at a dose of 60Gy. In the RT +icotinib group, icotinib will be administered concurrently  
239 with RT.

#### 240 5.1. Common Toxicity Criteria

241 Acute and late radiation toxicity was scored according to the Radiation Therapy Oncology Group  
242 (RTOG) morbidity scoring criteria. The icotinib toxicity was evaluated according to the common  
243 toxicity criteria for National Cancer Institute Common Terminology Criteria for Adverse Events  
244 version 4.0 (NCI-CTAE 4.0). Toxicities were recorded according to the worst score achieved during  
245 treatment.

#### 246 5.2. Concomitant Treatments

247 All medication administered must be recorded in the CRF (e.g., Concomitant Treatment Summary CRF)  
248 including the name, dose, possible side effects, start and if applicable stop date. Concomitant  
249 medication administered during the study must be recorded in the CRF including the generic name,  
250 dose, possible side effects, and start and end date of therapy. Any change in documented, concomitant  
251 medication must also be recorded.

#### 252 5.3. Treatment Interruptions

253 Therapy interruptions will usually not be necessary. However, if radiation is held for any reason, all  
254 Concurrent therapy must also be held. Interruptions may be kept to a minimum by the use of ancillary  
255 therapy and vigorous nutritional support.

256 Interruptions are permitted only on the basis of toxicity.

- 257 • Non-hematologic toxicities

- 258 1) Grade 3 or 4 radiation esophagitis or radiation pneumonitis.

- 259 2) Clinically significant grade 3 or 4 biochemical abnormalities.

- 260 • Haematological toxicities

- 261 1) Febrile neutropenia (absolute neutrophil count (ANC)  $< 1 \times 10^9/L$  and fever  $> 38.5^\circ C$ ).

- 262 2) Grade 3/4 neutropenia.

- 263 3) Grade 3/4 thrombocytopenia.

- 264 • Hepatic toxicities

- 265 1) ALT or AST > 5 ULN.  
266 2) Total bilirubin > 3 ULN.  
267 • Grade 3/4 skin rash or diarrhea  
268 • Episodes of vomiting ( $\geq$  grade 3) lasting  $\geq$  3 days and unresponsive to antiemetics  
269 • Weight loss  $\geq$  10% ( $\geq$  grade 2) of pretreatment weight.

270 Rarely, nontreatment related or unexpected toxicities may require interruption of therapy at the  
271 discretion of the treating oncologist. Interruption of therapy may continue until the toxicity has  
272 regressed to  $\leq$  grade 2 to allow resumption of therapy; however, every effort should be made to limit  
273 treatment interruptions to 1-2 weeks.

#### 274 **5.4. Dose Modifications**

275 Dose modifications were considered on a weekly basis during the treatment. Acute and late radiation  
276 toxicity was scored according to the Radiation Therapy Oncology Group morbidity scoring criteria.  
277 Every effort must be made to deliver the full dose to all patients. Irradiation was interrupted for grade 3  
278 or higher toxicities. Once the toxicities recovered to  $\leq$  grade 2, the patient's therapy should resume  
279 and full protocol dose should be delivered. The toxicity that forced any dose reduction must be  
280 documented. If interruption of therapy (up to 2 weeks) becomes necessary, radiation therapy should be  
281 completed to the prescribed doses. Total number of fractions and elapsed days should be carefully  
282 reported. If an interruption of more than 2 weeks is necessary, resumption of treatment is at the  
283 discretion of the radiation oncology chairs. The patient's treatment plan will be considered a major  
284 deviation, but follow-up will be continued. If a patient develops grade 3 esophagitis in the last week of  
285 treatment (i.e., with 5 or fewer radiation treatments remaining), radiation therapy may continue at the  
286 discretion of the treating physician.

287 The National Cancer Institute's Common Toxicity Criteria version 4.0. were used for toxicity of  
288 icotinib. A 1-week treatment break from icotinib was required when grade 3 or higher toxicity was  
289 observed. Interruptions were allowed up to 2 weeks. Oral icotinib was restarted at full dose when  
290 toxicities recovered to  $\leq$  grade 2.

#### 291 **5.5. EGFR Expression Assessment**

292 Levels of EGFR expression were assessed using immunohistochemistry (IHC) analysis in the central  
293 laboratory. All tissue samples were immersed and fixed in 4% paraformaldehyde, embedded in paraffin,  
294 and sectioned at a thickness of 8  $\mu$ m. Sections were probed with anti-EGFR antibodies and then with  
295 secondary antibodies. The sections were counterstained with hematoxylin and viewed under a  
296 microscope to assess the percentage and intensity of nuclear and non-nuclear staining in tumor cells as  
297 well as background staining.

#### 298 **5.6. Schedule Visits and Follow-Up**

##### 299 5.6.1 Schedule Visits

- 300 1) All patients must have the following procedures completed at selected times.  
301 Recording of adverse events and changes to adverse events.  
302 Recording of changes to concomitant medication.  
303 ECOG performance status.  
304 Physical examination.  
305 12-lead ECG.  
306 Laboratory tests: blood chemistry, full blood count, coagulation parameters, calculated creatinine  
307 clearance.  
308 Barium oesophagram, Neck/chest CT, abdominal/ pelvic CT/MRI to assess response.

309 Endoscopy and ultrasonography as clinically indicated.

310 2) Every effort should be made to schedule visits within the timeframe stated in the protocol. In the  
311 case that the visits cannot be within the timeframe stated in protocol then the treatment period study  
312 procedures can be performed  $\pm$  2 days of the scheduled visit.

#### 313 5.6.2 Follow-up

314 1) All subjects that discontinue treatment and have not withdrawn full consent to participate in the  
315 study will continue in the long-term follow-up phase. Long-term follow-up was regularly carried out at  
316 3-month interval in the first 2 years and at 6-month interval for 3 years, then annually.

317 2) Contact will be made approximately from the subject's last administration of study treatment (for the  
318 purposes of survival assessment) and can be made by telephone call, clinic visit, through another  
319 physician or via registry search.

### 320 **5.7. Withdrawal of Study Subjects**

321 Subjects have the right to withdraw fully or partially from the study at any time and for any reason. His  
322 or her future medical care should be taken without prejudice by the physician or at the institution.

323 Subjects who request to discontinue the study must continue to be followed for protocol specified  
324 follow-up procedures. The only exception to this is when a subject specifically withdraws consent for  
325 any further contact with him/her.

326 Withdrawal of full consent for a study means that the subject does not wish to receive further  
327 investigational treatment and does not wish to or is unable to continue further study participation.

328 Withdrawal of partial consent for a study means that the subject does not wish to take investigational  
329 product(s) any longer but is still willing to collaborate in providing further data by continuing on study  
330 (e.g., participate in all subsequent study visits or procedures and/or provide long-term  
331 follow-up/survival information).

332 The withdrawal of consent should be explained in detail in the medical records by the investigator and  
333 entered on the appropriate CRF page.

### 334 **5.8. Lost to Follow-Up**

335 All reasonable efforts must be made to locate subjects to determine and report their ongoing status.

336 Lost to follow-up is defined by the inability to reach the subject after a minimum of three documented  
337 phone calls, faxes, or emails as well as lack of response by subject to one registered mail letter.

338 All attempts should be documented in the subject's medical records. If after all attempts, the subject  
339 remains lost to follow-up, then the last known alive date as determined by the investigator should be  
340 reported and documented in the subject's medical records. If it is determined that the subject has died,  
341 the site will use permissible local methods to obtain the date and cause of death.

### 342 **5.9. Assessments**

#### 343 5.9.1 Safety Assessment

344 All patients were hospitalized and assessed weekly during the treatment course or more often if  
345 clinically indicated.

346 Safety assessments will be based on the following: clinical laboratory tests, ECOG performance status,  
347 physical examination including vital signs and ECG, and adverse events (AEs).

348 Laboratory tests will be performed by the local laboratory. Results of clinical laboratory tests  
349 performed on Day 1 of every week must be available prior to radiation dosing. Blood chemistry will  
350 include sodium, potassium, calcium, magnesium, phosphate, glucose, cholesterol, triglycerides,  
351 albumin, total protein, total bilirubin, alkaline phosphatase, ALT, AST, blood urea nitrogen, creatinine,  
352 uric acid and C-reactive protein.



353 Blood counts will include haemoglobin, haematocrit, white blood cells, neutrophils, basophils,  
 354 eosinophils, lymphocytes, monocytes and platelets.

355 Results of all laboratory tests required by this protocol must be provided to investigator, recorded on  
 356 the laboratory pages of the CRF.

357 5.9.2 Efficacy Assessment

358 Response of the primary tumor was determined 2 months after the completion of radiotherapy. Patients  
 359 were scheduled to have endoscopy and CT/MRI scan. Once patients developed disease progression  
 360 during treatment, the assessment was performed at the time of progression.

361 Computed tomography/magnetic resonance imaging (CT/MRI) for neck, chest, abdomen, and pelvis  
 362 will be performed at screening and as clinically indicated.

363 CT scans should be acquired with  $\leq 5$ mm slices with no intervening gap (contiguous). Should a  
 364 subject have a contraindication for CT IV contrast, a non-contrast CT of the neck and chest and a  
 365 contrast enhanced MRI of the abdomen and pelvis may be obtained. MRI should be acquired with slice  
 366 thickness of  $\leq 5$  mm slices. Every attempt should be made to image each subject using an identical  
 367 acquisition protocol on the same scanner for all imaging time points.

368 Brain CT or MRI scans during on-study treatment and follow up periods are required only if there is a  
 369 prior history of lesions present at Screening, or as clinically indicated for new signs and symptoms that  
 370 suggest CNS involvement.

371 PET/CT scan if there is a reasonable assumption that the patient may have occult lesions or  
 372 contraindication of CT or MRI contrast.

373 5.9.3 On Study Procedural Outline

374 Table 1: Screening Procedural Outline

| Procedure                    | Screening Visits | Notes                                                                                                                                                            |
|------------------------------|------------------|------------------------------------------------------------------------------------------------------------------------------------------------------------------|
| Day                          | $\leq -14$       |                                                                                                                                                                  |
| Informed Consent             | ×                | A subject is considered enrolled only when a protocol specific informed consent is signed.                                                                       |
| Inclusion/Exclusion Criteria | ×                |                                                                                                                                                                  |
| Medical History              | ×                | Baseline signs and symptoms are those that are assessed within 2 weeks prior to the treatment. Include any toxicities or allergy related to previous treatments. |
| Medication History           | ×                |                                                                                                                                                                  |
| Weight and Height            | ×                |                                                                                                                                                                  |
| Physical Examination         | ×                |                                                                                                                                                                  |
| ECOG performance status      | ×                |                                                                                                                                                                  |
| ECG                          | ×                |                                                                                                                                                                  |

|                                       |   |                                                                                                                                                                                                                                       |
|---------------------------------------|---|---------------------------------------------------------------------------------------------------------------------------------------------------------------------------------------------------------------------------------------|
| Laboratory Tests                      | × | blood chemistry, full blood count, coagulation parameters, stool test, urinalysis, calculated creatinine clearance.                                                                                                                   |
| CT/MRI (neck, chest, abdomen, pelvis) | × | Within 28 days of study procedure on Day 1. Baseline imaging done as part of the subject's previous routine care before signing the informed consent form and completed within 28 days prior to study procedure need not be repeated. |
| Monitor for Adverse Events            | × | All adverse events must be collected from the date of subject's written consent until 30 days post discontinuation of dosing.                                                                                                         |
| FDG-PET/CT Scan                       |   | as clinical indicated                                                                                                                                                                                                                 |
| Brain CT/MRI                          |   | as clinical indicated                                                                                                                                                                                                                 |
| Cardiac Ultrasound                    |   | as clinical indicated                                                                                                                                                                                                                 |
| Tumor Tissue                          |   | Optional, but encouraged. To test EGFR expression                                                                                                                                                                                     |

375

376 Table 2: On Therapy and Follow-up Procedures

| parameter                        | Day 0    | Weekly during therapy | 2 months after completion of therapy | Survival follow-up |
|----------------------------------|----------|-----------------------|--------------------------------------|--------------------|
| Medical History                  | ×        | ×                     | ×                                    | ×                  |
| Physical Examination             | ×        | ×                     | ×                                    | ×                  |
| Weight*                          | ×        |                       | ×                                    |                    |
| Full blood count                 | ×        | ×                     | ×                                    | ×                  |
| Blood chemistry*                 | ×        |                       | ×                                    | ×                  |
| Endoscopy <sup>#</sup>           |          |                       |                                      |                    |
| Neck, chest and abdominal CT/MRI |          |                       | ×                                    | ×                  |
| Ultrasonography <sup>#</sup>     |          |                       |                                      |                    |
| Barium oesophagram               | ×        |                       | ×                                    | ×                  |
| ECG                              | ×        |                       | ×                                    | ×                  |
| ECOG Performance status          | ×        | ×                     | ×                                    | ×                  |
| Adverse Events                   | baseline | Continuous            |                                      |                    |

377 \*repeated every 2 weeks during treatment, <sup>#</sup> as clinically indicated.

## 378 **6. SAFETY DATA COLLECTION, RECORDING, AND REPORTING**

### 379 **6.1. Adverse Events**

#### 380 6.1.1 Definition of Adverse Events

381 An adverse event is defined as any untoward medical occurrence in a clinical trial subject. The event  
382 does not necessarily have a causal relationship with study treatment. The investigator is responsible for  
383 ensuring that any adverse events observed by the investigator or reported by the subject are recorded in  
384 the subject's medical record and reported as described in Section 6.1.2 and Section 6.2.2.

385 The definition of adverse events includes worsening of a pre-existing medical condition. Worsening  
386 indicates the pre-existing medical condition (e.g., diabetes, migraine headaches, gout) has increased in  
387 severity, frequency, and/or duration, and/or has an association with a significantly worse outcome. A  
388 pre-existing condition that has not worsened during the study, and involves an intervention such as  
389 elective cosmetic surgery or a medical procedure while on study, is not considered an adverse event.

390 Disease progression of the recurrent tumor should not be captured as an adverse event (including fatal  
391 adverse event). If there are signs and/or symptoms of disease progression that are new or worsened  
392 from baseline signs and/or symptoms, these should be reported as adverse event(s). If a new primary  
393 malignancy appears, it will be considered an adverse event.

#### 394 6.1.2 Reporting Procedures for Adverse Events

395 The investigator is responsible for ensuring that all adverse events observed by the investigator or  
396 reported by the subject that occur after signing of the informed consent through the safety follow-up  
397 are reported using the applicable CRF (e.g., Adverse Event Summary CRF). Adverse events will not be  
398 collected for screen failures or subjects in long term follow-up for survival.

399 The investigator must assign the following adverse event attributes:

- 400 • Adverse event diagnosis or syndrome(s), if known (if not known, signs or symptoms).
- 401 • Dates of onset and resolution.
- 402 • Severity (and/or toxicity per protocol).
- 403 • Assessment of relatedness to icotinib or radiotherapy.
- 404 • Action taken.

405 The adverse event toxicity grading scale used will be the CTCAE 4.0 and RTOG criteria

406 The investigator must assess whether the adverse event is possibly related to icotinib or radiotherapy.  
407 This relationship is indicated by a "yes" or "no" response to the question: "Is there a reasonable  
408 possibility that the event may have been caused by icotinib or radiotherapy?"

409 The investigator must assess whether the serious adverse event is possibly related to any  
410 study-mandated screening procedure. This relationship is indicated by a "yes" or "no" response to the  
411 question: "Is there a reasonable possibility that the event may be related to screening procedures?"

412 The investigator must assess whether the adverse event is possibly related to any study mandated  
413 activity or procedure. This relationship is indicated by a "yes" or "no" response to the question: "Is  
414 there a reasonable possibility that the event may have been caused by a study activity/procedure?"

415 The investigator is responsible for reviewing laboratory test results and determining whether an  
416 abnormal value in an individual study subject represents a clinically significant change from the  
417 subject's baseline values. In general, abnormal laboratory findings without clinical significance (based  
418 on the investigator's judgment) should not be recorded as adverse events. However, laboratory value  
419 changes that require treatment or adjustment in current therapy are considered adverse events. Where  
420 applicable clinical sequelae (not the laboratory abnormality) should be recorded as the adverse event.

421 Medically significant adverse events considered related to the investigational product by the  
422 investigator or the sponsor will be followed until resolved or considered stable. The investigator’s  
423 clinical judgment will be used to determine whether a subject should be removed from treatment or  
424 from the study due to an adverse event. A subject, or subject’s legal guardian, may also voluntarily  
425 withdraw from treatment or from the study due to an adverse event. If the subject withdraws full  
426 consent, the subject should be encouraged to undergo, at a minimum, an end-of-study assessment.

## 427 **6.2. Serious Adverse Events**

### 428 6.2.1 Definition of Serious Adverse Events

429 A serious adverse event is defined as an adverse event that meets at least 1 of the following serious  
430 criteria:

- 431 • fatal;
- 432 • life-threatening (places the subject at immediate risk of death);
- 433 • requires in-patient hospitalization or prolongation of existing hospitalization;
- 434 • results in persistent or significant disability/incapacity;
- 435 • congenital anomaly/birth defect; and/or
- 436 • other medically important serious event.

437 An adverse event would meet the criterion of “requires hospitalization”, if the event necessitated an  
438 in-patient admission to a health care facility (e.g., overnight stay).

439 Overnight stays in the hospital induced by geographical factors won’t be registered as hospitalization.

440 If an investigator considers an event to be clinically important, but it does not meet any of the other  
441 serious criteria, the event could be classified as a serious adverse event under the criterion of “other  
442 medically important serious event”. Examples of such events could potentially include, but are not  
443 limited to, allergic bronchospasm, convulsions, pneumonitis, treatment-induced liver injury, exfoliative  
444 dermatitis, or events that necessitate an emergency room visit, outpatient surgery, or urgent  
445 intervention.

### 446 6.2.2 Reporting Procedures for Serious Adverse Events

447 The investigator is responsible for ensuring that all serious adverse events observed by the investigator  
448 or reported by the subject (including screen failures) that occur after signing of the informed consent  
449 through the safety follow-up visit are recorded in the subject’s medical record.

450 Serious adverse events will not be collected for subjects in long term follow-up for survival.

451 New information relating to a previously reported serious adverse event must be reported to the  
452 principal investigator within 1 working day of receipt. The investigator may be asked to provide  
453 additional follow-up information, which may include a discharge summary or extracts from the medical  
454 record. Information provided about the serious adverse event must be consistent with that recorded on  
455 the applicable CRF (e.g., Adverse Event Summary CRF). Relevant medical records are to be submitted  
456 to principal investigator as soon as they become available; autopsy reports can and should be provided  
457 for deaths, if available.

458 Serious adverse events deemed possibly related to the investigational drug by the investigator occurring  
459 up to 30 days after the safety follow-up will be reported to Zhejiang Bata Pharma Inc. and the principal  
460 investigator within 1 working day of discovery or notification of the event.

461 If a subject is permanently withdrawn from the study because of a serious adverse event, this  
462 information must also be immediately reported.

## 463 **7. END OF STUDY**

### 464 **7.1. Primary Completion**

465 The primary completion of each part of the study will occur when target enrolment is complete and  
466 each subject does at least one of the following.

- 467 • Has had the opportunity to complete the safety follow-up visit. This visit must be performed 90 days  
468 after the last therapy. The safety follow-up visit completion date is the date that the final assessment  
469 and/or procedure is performed.
- 470 • Withdraws from study.

## 471 **7.2. End of Trial**

472 The end of trial will occur when target enrolment is complete and each subject either withdraws from  
473 study or completes long-term follow-up.

474 All subjects that have not withdrawn full consent to participate in the study will continue in the  
475 long-term follow-up phase. Long-term follow-up will continue approximately every 3 months in the  
476 first 2 years, every 6 months for 3 years, and then annually.

## 477 **8. STATISTICAL CONSIDERATIONS**

478 This is a randomized, multicenter, open-label phase II trial to evaluate the efficacy and toxicity of  
479 radiotherapy plus icotinib in elderly ESCC patients.

### 480 8.1. Study Endpoints, Subsets, and Covariates (Phase II)

#### 481 8.1.1 Primary and Secondary Endpoints

482 Primary endpoints of the study:

483 To evaluate whether overall survival in the combined group was superior to the RT alone group.

484 Secondary endpoints of the study:

485 To evaluate the toxicity and disease free survival, and EGFR expression in the radiotherapy plus  
486 icotinib group.

487 Overall survival was calculated from the day of randomization until death or until the last follow-up.

488 Disease free survival was measured from the day of randomization until disease progression, death, or  
489 the date of the last follow-up for those still alive.

#### 490 8.1.2 Analysis Subsets

##### 491 Safety Analysis Set

492 The analysis of all endpoints, unless noted otherwise, will be conducted on the intention-to-treat (ITT)  
493 set. ITT is defined as all subjects that are enrolled and receive either radiotherapy plus icotinib or  
494 radiotherapy treatment.

#### 495 8.1.3 Sample Size

496 The number of patients required was estimated according to the methodology by Lakatos and Edward  
497 for clinical trials [15]. We assume the 2-year overall survival rate can increase from 30% to 50% with  
498 the addition of icotinib to concurrent radiotherapy for esophageal cancer [16]. With a minimum of  
499 2-year follow-up and considering a 5% missing data, the trial needs a recruitment of 127 patients (63 in  
500 the control group and 64 in the combination treatment group) to have a power of 80% to detect an  
501 improvement in 2-year survival rate. Approximately 127 subjects will be enrolled into this study.

#### 502 8.1.4 Statistical methods

503 All the statistical analyses were performed using SPSS version 20.0 software (SPSS Inc., Chicago, IL,  
504 USA). Chi-square test was used to evaluate differences in patient characteristics and treatment  
505 toxicities in the two groups. Survival analysis were performed by using the Kaplan–Meier method and  
506 compared with the log-rank test. Hazard ratios (HRs) with 95% confidence intervals (CI) were  
507 calculated using a Cox regression model. Independent prognostic factors were identified by

508 multivariate analyses using the Cox proportional hazards model. All statistical analyses were performed  
509 with a two-sided significance value of 0.05.

## 510 **9. ETHICAL CONSIDERATIONS**

### 511 **9.1. Good Clinical Practice**

512 This study will be conducted in accordance with Good Clinical Practice (GCP), as defined by China  
513 Food and Drug Administration (CFDA).

514 The study will be conducted in compliance with the protocol. The protocol and any amendments and  
515 the subject informed consent will receive independent ethics committee of Hangzhou Cancer Hospital,  
516 Huaian First People's Hospital, and Lishui Central Hospital approval/favorable opinion prior to  
517 initiation of the study.

518 Personnel involved in conducting this study will be qualified by education, training, and experience to  
519 perform their respective tasks.

520 This study will not use the services of study personnel where sanctions have been invoked or where  
521 there has been scientific misconduct or fraud (e.g., loss of medical licensure, debarment).

### 522 **9.2. Independent Ethics Committee**

523 Before study initiation, the investigator must have written and dated approval/favorable opinion from  
524 the independent ethics committee of Hangzhou Cancer Hospital, Huaian First People's Hospital, and  
525 Lishui Central Hospital, for the protocol, consent form, subject recruitment materials (e.g.,  
526 advertisements), and any other written information to be provided to subjects. A copy of the written  
527 approval of the protocol and informed consent form must be received by Zhejiang Bata Pharma Inc.  
528 before recruitment of subjects into the study.

529 The investigator or Zhejiang Bata Pharma Inc., Ltd should provide the independent ethics committee  
530 with reports, updates and other information (e.g., expedited safety reports, amendments) according to  
531 regulatory requirements or institution procedures.

### 532 **9.3. Informed Consent**

533 Before a subject's participation in the clinical study, the investigator is responsible for obtaining written  
534 informed consent from the subject or legally acceptable representative. Investigators must ensure that  
535 subjects are clearly and fully informed about the purpose, anticipated benefits, potential risks regarding  
536 the clinical study.

537 The sample informed consent form will adhere to the ethical principles that have their origin in the  
538 Declaration of Helsinki. The original signed informed consent form should be retained in accordance  
539 with institutional policy, and a copy of the signed consent form should be provided to the subject or  
540 legally acceptable representative.

### 541 **9.4. Subject Confidentiality**

542 The investigator must ensure that the subject's confidentiality is maintained. On the CRFs or other  
543 documents submitted to Zhejiang Bata Pharma Inc., Ltd, subjects should be identified by their initials,  
544 date of birth, and a subject identification number. The consent form must also include a statement that  
545 authorized representatives of the company, of the regulatory have direct access to review the subject's  
546 original medical records.

547 The rights, safety, and well-being of the study subjects are the most important considerations and  
548 should prevail over interests of science and society.

## 549 **10. REFERENCES**

550 1. Mariette C, Piessen G, Triboulet JP: Therapeutic strategies in oesophageal carcinoma: role of  
551 surgery and other modalities. *Lancet Oncol* 8:545-53, 2007

- 552 2. Nallapareddy S, Wilding GE, Yang G, et al: Chemoradiation is a tolerable therapy for older  
553 adults with esophageal cancer. *Anticancer Research* 25:3055-3060, 2005
- 554 3. Poon RT, Law SY, Chu KM, et al: Esophagectomy for carcinoma of the esophagus in the  
555 elderly: results of current surgical management. *Ann Surg* 227:357-64, 1998
- 556 4. Herskovic A, Martz K, al-Sarraf M, et al: Combined chemotherapy and radiotherapy  
557 compared with radiotherapy alone in patients with cancer of the esophagus. *N Engl J Med* 326:1593-8,  
558 1992
- 559 5. Minsky BD, Pajak TF, Ginsberg RJ, et al: INT 0123 (Radiation Therapy Oncology Group  
560 94-05) phase III trial of combined-modality therapy for esophageal cancer: high-dose versus  
561 standard-dose radiation therapy. *J Clin Oncol* 20:1167-74, 2002
- 562 6. Chino O, Makuuchi H, Machimura T, et al: Treatment of esophageal cancer in patients over  
563 80 years old. *Surg Today* 27:9-16, 1997
- 564 7. Cui Z, Tian Y, He B, et al: Associated factors of radiation pneumonitis induced by precise  
565 radiotherapy in 186 elderly patients with esophageal cancer. *Int J Clin Exp Med* 8:16646-51, 2015
- 566 8. Tan F, Shen X, Wang D, et al: Icotinib (BPI-2009H), a novel EGFR tyrosine kinase inhibitor,  
567 displays potent efficacy in preclinical studies. *Lung Cancer* 76:177-82, 2012
- 568 9. Pande AU, Iyer RV, Rani A, et al: Epidermal growth factor receptor-directed therapy in  
569 esophageal cancer. *Oncology* 73:281-289, 2008
- 570 10. Dragovich T, McCoy S, Fenoglio-Preiser CM, et al: Phase II trial of erlotinib in  
571 gastroesophageal junction and gastric adenocarcinomas: SWOG 0127. *J Clin Oncol* 24:4922-7, 2006
- 572 11. Janmaat ML, Gallegos-Ruiz MI, Rodriguez JA, et al: Predictive factors for outcome in a  
573 phase II study of gefitinib in second-line treatment of advanced esophageal cancer patients. *J Clin*  
574 *Oncol* 24:1612-9, 2006
- 575 12. Chinnaiyan P, Huang S, Vallabhaneni G, et al: Mechanisms of Enhanced Radiation Response  
576 following Epidermal Growth Factor Receptor Signaling Inhibition by Erlotinib (Tarceva). *Cancer*  
577 *Research* 65:3328-3335, 2005
- 578 13. Tortora G, Gelardi T, Ciardiello F, et al: The rationale for the combination of selective EGFR  
579 inhibitors with cytotoxic drugs and radiotherapy. *Int J Biol Markers* 22:S47-52, 2007
- 580 14. Rodriguez CP, Adelstein DJ, Rice TW, et al: A phase II study of perioperative concurrent  
581 chemotherapy, gefitinib, and hyperfractionated radiation followed by maintenance gefitinib in  
582 locoregionally advanced esophagus and gastroesophageal junction cancer. *J Thorac Oncol* 5:229-35,  
583 2010
- 584 15. Iyer R, Chhatrala R, Shefter T, et al: Erlotinib and radiation therapy for elderly patients with  
585 esophageal cancer - clinical and correlative results from a prospective multicenter phase 2 trial.  
586 *Oncology* 85:53-8, 2013
- 587 16. Zhang XB, Xie CY, Li WF, et al: [Phase II study of radiotherapy plus erlotinib for elder  
588 patients with esophageal carcinoma]. *Zhonghua Yi Xue Za Zhi* 92:1615-7, 2012
- 589 17. Zhai Y, Hui Z, Wang J, et al: Concurrent erlotinib and radiotherapy for  
590 chemoradiotherapy-intolerant esophageal squamous cell carcinoma patients: results of a pilot study.  
591 *Diseases of the Esophagus* 26:503-509, 2013
- 592 18. Xu Y, Zheng Y, Sun X, et al: Concurrent radiotherapy with gefitinib in elderly patients with  
593 esophageal squamous cell carcinoma: Preliminary results of a phase II study. *Oncotarget* 6:38429-39,  
594 2015
- 595 19. Hu W, Wang W, Yang P, et al: Phase I study of icotinib, an EGFR tyrosine kinase inhibitor

596 combined with IMRT in nasopharyngeal carcinoma. *Int J Clin Exp Med* 8:15675-15683, 2015
