# Supplementary material for: Icotinib With Concurrent Radiotherapy vs Radiotherapy Alone in Older Adults With Unresectable Esophageal Squamous Cell Carcinoma: A Phase II Randomized Clinical Trial
Source: PubMed Central journal article supplement (PMC7542309; doi:10.1001/jamanetworkopen.2020.19440), 2020-10-07
Supplement: jamanetwopen-e2019440-s002.pdf [file jamanetwopen-e2019440-s002.pdf]

## Supplemental Online Content

Luo H, Jiang W, Ma L, et al. Icotinib with concurrent radiotherapy vs radiotherapy alone in older adults with unresectable esophageal squamous cell carcinoma: a phase II randomized clinical trial. *JAMA Netw Open*. 2020;3(10):e2019440.  
doi:10.1001/jamanetworkopen.2020.19440

**eFigure 1.** Overall Survival in RT + Icotinib Group

**eFigure 2.** Overall Survival in RT Group

**eTable 1.** Univariate Analysis of Potential Factors Associated With Survival in all ESCC Patients

**eTable 2.** Multivariate Analysis of Prognostic Factors in all ESCC Patients

**eTable 3.** Patterns of First Failure Between Two Groups of Elderly ESCC Patients

This supplemental material has been provided by the authors to give readers additional information about their work.

**eFigure 1. Overall Survival in RT + Icotinib Group**

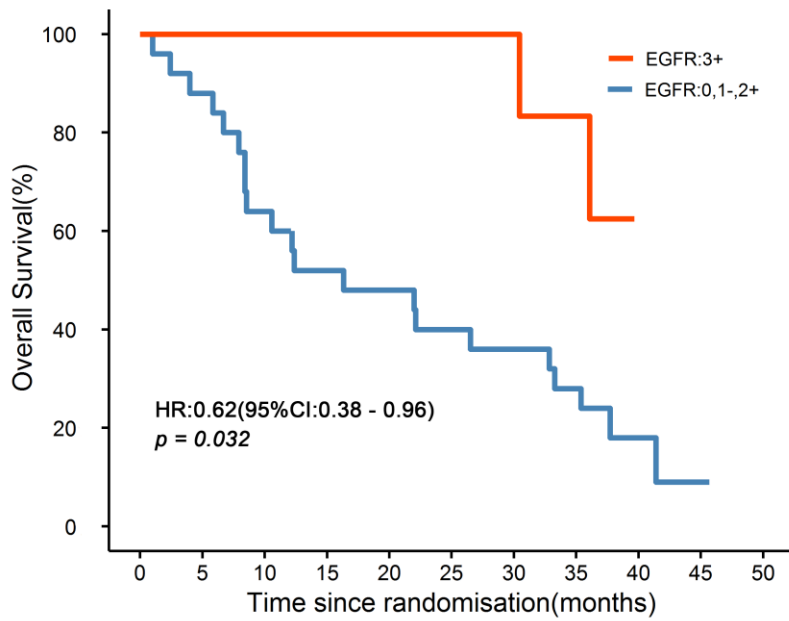

**Number at Risk**

|              |    |    |    |    |    |    |   |   |   |   |   |
|--------------|----|----|----|----|----|----|---|---|---|---|---|
| EGFR:3+      | 7  | 6  | 6  | 6  | 6  | 6  | 6 | 5 | 0 | 0 | 0 |
| EGFR:0,1-,2+ | 25 | 22 | 16 | 13 | 12 | 10 | 9 | 7 | 2 | 1 | 0 |

**eFigure 2. Overall Survival in RT Group**

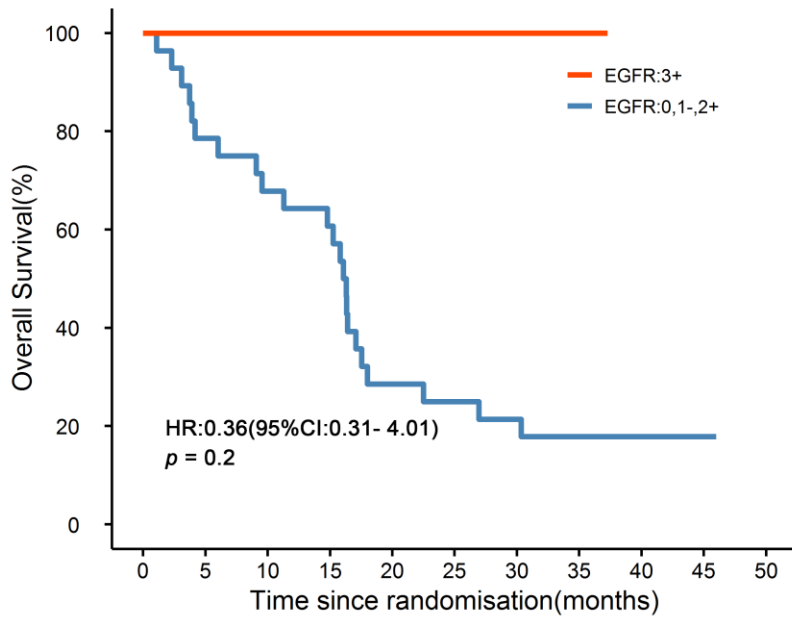

Number at Risk

|              |    |    |    |    |   |   |   |   |   |   |   |
|--------------|----|----|----|----|---|---|---|---|---|---|---|
| EGFR:3+      | 1  | 1  | 1  | 1  | 1 | 1 | 1 | 1 | 0 | 0 | 0 |
| EGFR:0,1-,2+ | 28 | 22 | 19 | 17 | 8 | 7 | 6 | 5 | 2 | 1 | 0 |

**eTable 1. Univariate Analysis of Potential Factors Associated With Survival in all ESCC Patients**

| Factors            | HR        | 95%CI-low | 95%CI-up | p    |
|--------------------|-----------|-----------|----------|------|
| TKI                |           |           |          |      |
| No TKI             | reference |           |          |      |
| TKI                | 1.739     | 1.146     | 2.638    | .009 |
| Sex                |           |           |          |      |
| Female             | reference |           |          |      |
| Male               | .663      | .430      | 1.020    | .061 |
| Age                |           |           |          |      |
| 70 ≤ age < 75      | reference |           |          |      |
| 75 ≤ age < 80      | .893      | .532      | 1.499    | .669 |
| Age ≥ 80           | .842      | .491      | 1.444    | .532 |
| T stage            |           |           |          |      |
| 2                  | reference |           |          |      |
| 3                  | .431      | .229      | .812     | .009 |
| 4                  | .582      | .347      | .977     | .040 |
| N stage            |           |           |          |      |
| 0                  | reference |           |          |      |
| 1                  | .746      | .491      | 1.135    | .171 |
| ECOG               |           |           |          |      |
| 0-1                | reference |           |          |      |
| 2                  | .780      | .518      | 1.175    | .235 |
| Location           |           |           |          |      |
| Cervical esophagus | reference |           |          |      |
| Upper-third        | .488      | .184      | 1.294    | .149 |
| Middle-third       | .572      | .303      | 1.079    | .084 |
| Lower-third        | 1.074     | .648      | 1.780    | .781 |
| Tumor length       |           |           |          |      |
| <5                 | reference |           |          |      |
| ≥5                 | .657      | .430      | 1.004    | .052 |
| EGFR               |           |           |          |      |
| 0-2                | reference |           |          |      |
| 3                  | .427      | .15       | 1.2      | .106 |

Abbreviation: ESCC, esophageal squamous cell carcinoma; HR, hazard ratio; CI: confidence interval; TKI: tyrosine kinase inhibitor; ECOG: Eastern Cooperative Oncology Group performance status.

**eTable 2. Multivariate Analysis of Prognostic Factors in all ESCC Patients**

| Factors            | HR        | 95%CI-low | 95%CI-up | p    |
|--------------------|-----------|-----------|----------|------|
| TKI                |           |           |          |      |
| No TKI             | Reference |           |          |      |
| TKI                | 1.703     | 1.090     | 2.662    | .019 |
| Sex                |           |           |          |      |
| Female             | Reference |           |          |      |
| Male               | .804      | .507      | 1.274    | .353 |
| Age                |           |           |          |      |
| 70 ≤ age < 75      | Reference |           |          |      |
| 75 ≤ age < 80      | 1.201     | .682      | 2.117    | .526 |
| Age ≥ 80           | .962      | .554      | 1.673    | .892 |
| T                  |           |           |          |      |
| 2                  | Reference |           |          |      |
| 3                  | .465      | .240      | .902     | .023 |
| 4                  | .644      | .378      | 1.095    | .104 |
| N                  |           |           |          |      |
| 0                  | Reference |           |          |      |
| 1                  | .664      | .413      | 1.068    | .092 |
| ECOG               |           |           |          |      |
| 0-1                | Reference |           |          |      |
| 2                  | .812      | .523      | 1.259    | .352 |
| Location           |           |           |          |      |
| Cervical esophagus | Reference |           |          |      |
| Upper-third        | .544      | .191      | 1.555    | .256 |
| Middle-third       | .542      | .268      | 1.094    | .087 |
| Lower-third        | 1.043     | .612      | 1.779    | .876 |
| Tumor length(cm)   |           |           |          |      |
| <5                 | Reference |           |          |      |
| ≥5                 | .784      | .492      | 1.249    | .306 |

Abbreviation: ESCC, esophageal squamous cell carcinoma; HR, hazard ratio; CI: confidence interval; TKI: tyrosine kinase inhibitor; ECOG: Eastern Cooperative Oncology Group performance status

**eTable 3. Patterns of First Failure Between Two Groups of Elderly ESCC Patients**

|                                         | <b>RT group (N=63)</b> | <b>RT+icotinib group (N=64)</b> |
|-----------------------------------------|------------------------|---------------------------------|
| Local recurrence                        | 36 (57.1%)             | 24 (37.5%)                      |
| Regional recurrence                     | 4 (6.3%)               | 3 (4.7%)                        |
| Distant metastasis                      | 10 (15.9%)             | 4 (6.3%)                        |
| Both local and regional                 | 2 (3.2%)               | 1 (1.6%)                        |
| Both local/regional and distant failure | 7 (11.1%)              | 4 (6.3%)                        |

Values are number (%) unless otherwise stated.

Abbreviation: ESCC, esophageal squamous cell carcinoma; RT, radiation therapy.
