# Supplementary material for: Icotinib With Concurrent Radiotherapy vs Radiotherapy Alone in Older Adults With Unresectable Esophageal Squamous Cell Carcinoma: A Phase II Randomized Clinical Trial
Source: PubMed Central journal article supplement (PMC7542309; doi:10.1001/jamanetworkopen.2020.19440), 2020-10-07
Supplement: jamanetwopen-e2019440-s003.pdf [file jamanetwopen-e2019440-s003.pdf]

## Data Sharing Statement

Luo. Icotinib With Concurrent Radiotherapy vs Radiotherapy Alone in Older Adults With Unresectable Esophageal Squamous Cell Carcinoma. *JAMA Netw Open*. Published October 07, 2020. 10.1001/jamanetworkopen.2020.19440

### Data

**Data available:** No
